# Supplementary material for: Layer-by-Layer Deposited Multi-Modal PDAC/rGO Composite-Based Sensors
Source: MDPI journal article supplement (doi:10.3390/foods12020268), 2023-01-06
Supplement: s1 [file s1]

Supplementary materials

# Layer-by-Layer Deposited Multi-Modal PDAC/rGO Composite-Based Sensors

Ammar Al-Hamry <sup>1</sup>, Tianqi Lu <sup>1</sup>, Jing Bai <sup>1</sup>, Anurag Adiraju <sup>1</sup>, Tharun K. Ega <sup>1</sup>, Igor A. Pašti <sup>2</sup> and Olfa Kanoun <sup>1,\*</sup>

<sup>1</sup> Measurement and Sensor Technology, Department of Electrical Engineering and Information Technology, Chemnitz University of Technology, 09107 Chemnitz, Germany

<sup>2</sup> University of Belgrade—Faculty of Physical Chemistry, Studentski trg 12-16, 11158 Belgrade, Serbia

\* Correspondence: olfa.kanoun@etit.tu-chemnitz.de

Supplementary figures:

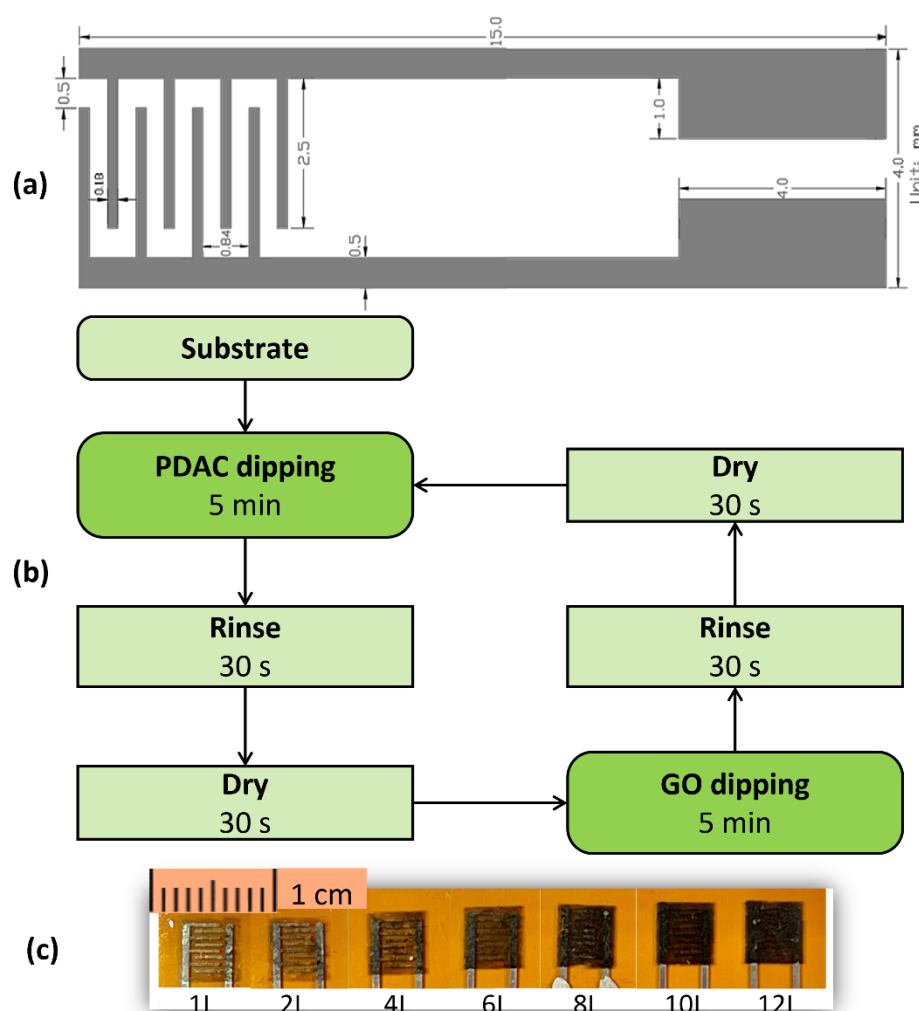

**Figure S1.** (a) Schematic representation of the screen printed Ag electrode used for the LbL deposition of PDAC/GO bi-layers; (b) Protocol for the LbL deposition of the PDAC/GO bi-layers and (c) photograph of the LbL PDAC/GO based sensor after thermal reduction.

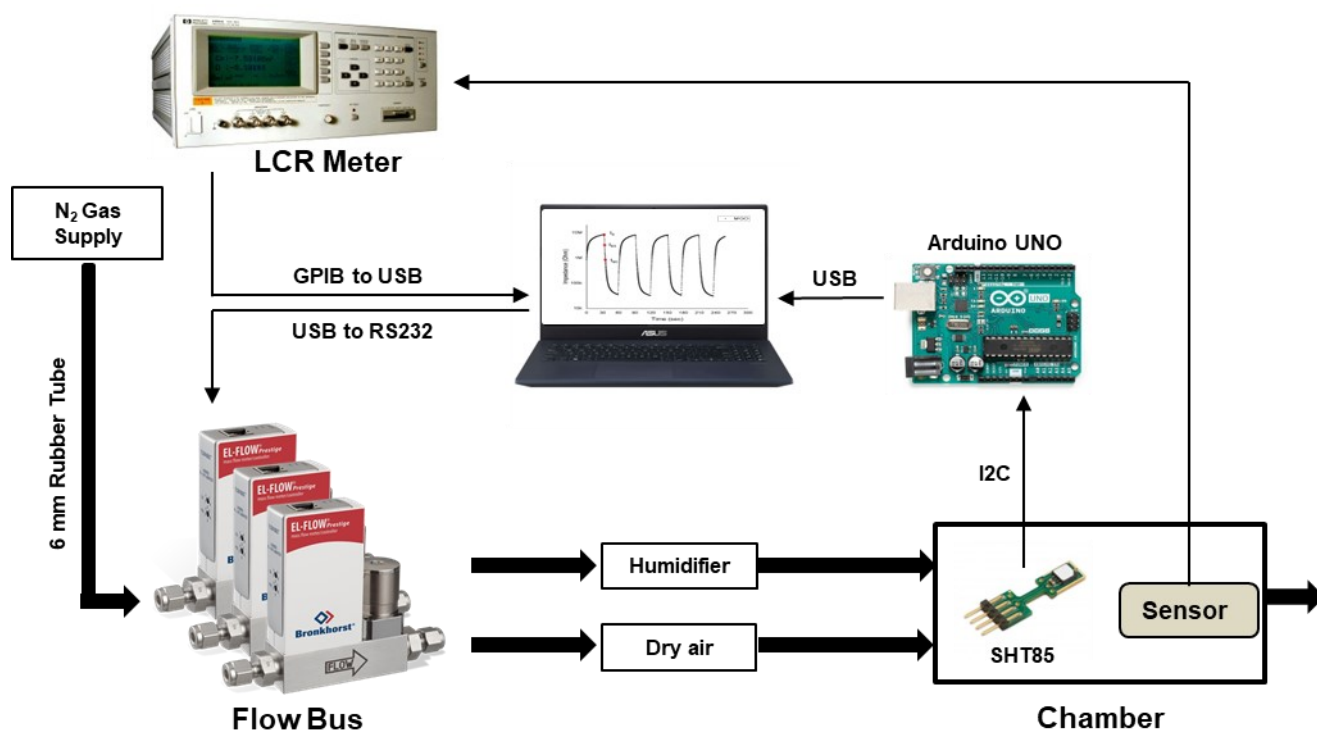

Figure S2. The block and connection diagram of the humidity measurement system.

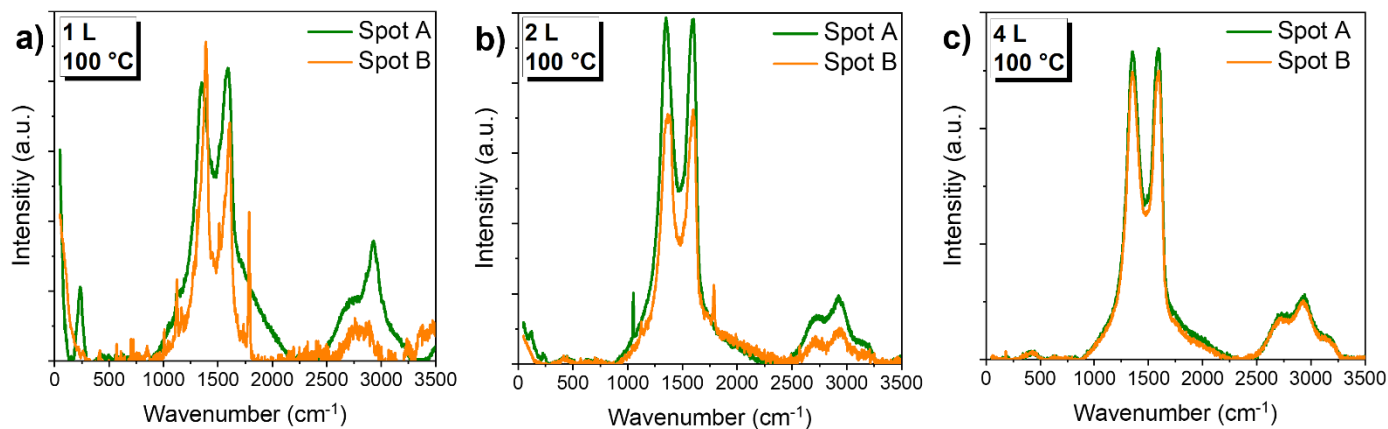

Figure S3. Raman spectra of PDAC/rGO composite electrodes reduced at 100 °C with (a) 1 bi-layer; (b) 2 bi-layers; (c) 4 bi-layers. Yellow and green spectra are taken at two different spots of the sample (marked Spot A and Spot B).

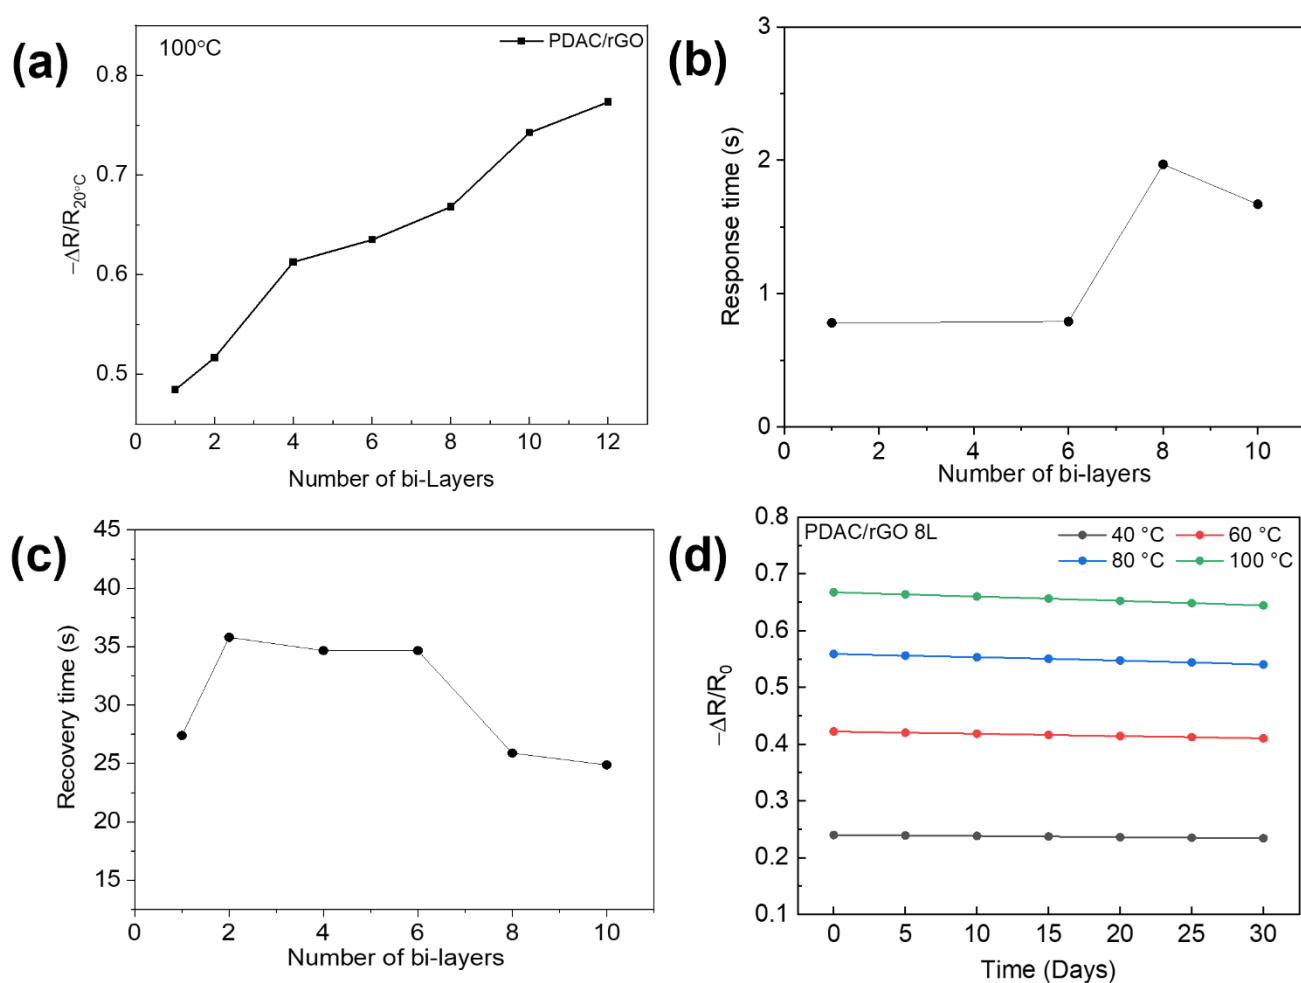

**Figure S4.** Temperature measurement (a) sensitivity curve as the function of the number of the PDAC/rGO layers; (b) response time as the function of the number of the PDAC/rGO layers; (c) recovery time as the function of the number of the PDAC/rGO layers; (d) Long-term stability curves for the temperature measurements using PDAC/rGO-8L sensor.

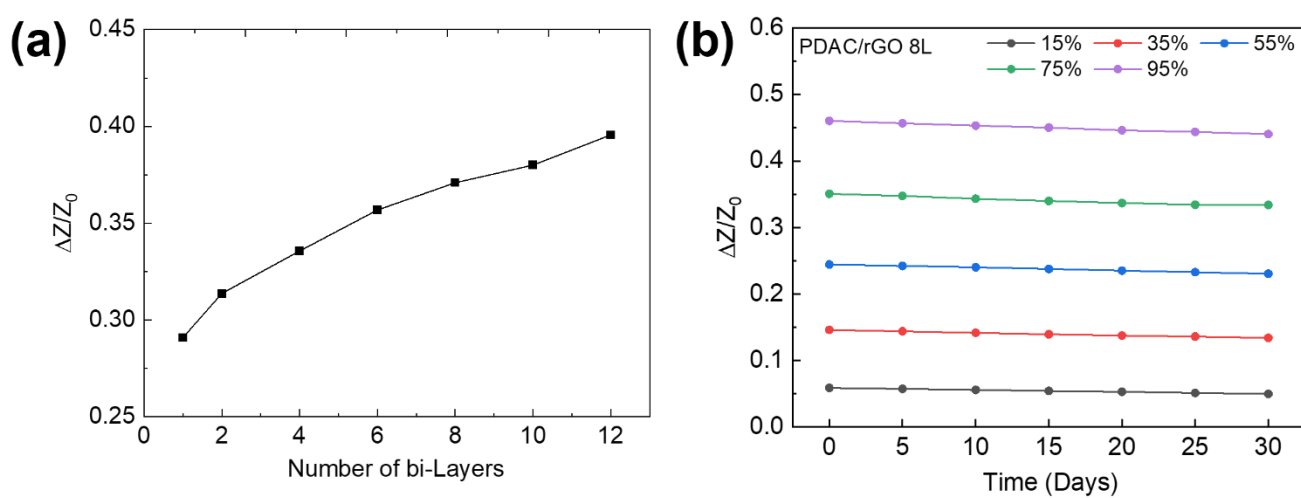

**Figure S5.** (a) Sensitivity of the response as response curve of different layers for the relative humidity measurements; (b) Long-term stability curves for the relative humidity measurements using PDAC/rGO-8L sensor.

**Supplementary Tables:****Table S1.** Information of the detected real samples.

| Sample       | Type                                                              | Storage temp.    | Storage time |
|--------------|-------------------------------------------------------------------|------------------|--------------|
| Wine         | Rot Tempranillo 2015 Trocken,<br>original liquid (Alcohol: 10.5%) | Room temperature | Newly opened |
| Coffee       | Saturated brewed solution<br>(0.2020 g/ml)                        | Room temperature | Newly opened |
| Fresh Beef   | Ground meat (10 g)                                                | 8 °C             | 2 days       |
| Spoiled Beef | Ground meat (10 g)                                                | 8 °C             | 10 days      |
| Fresh Pork   | Ground meat (10 g)                                                | 8 °C             | 2 days       |
| Spoiled Pork | Ground meat (10 g)                                                | 8 °C             | 10 days      |
